# Supplementary material
Source: MDPI journal article supplement (https://www.mdpi.com/2077-1312/9/6/654)

S4 – Glénan Archipelago. Relationships between pressure levels, as indicated by geographical distances from the center of the maerl extraction area, and M-AMBI and TDI

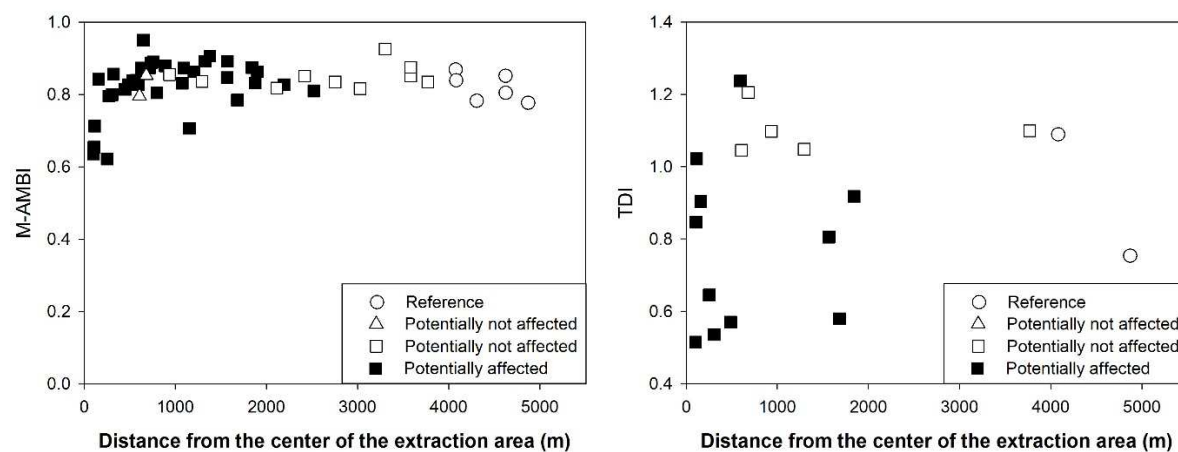

S5: Belgium stations submitted to dredge disposal. Relationship between the volumes dredged as intermediate and high versus M-AMBI for the *Abra alba* community, the *Limecola bathica* community and the *Nephtys cirrosa* community in 2008, 2010, 2011 and 2012.

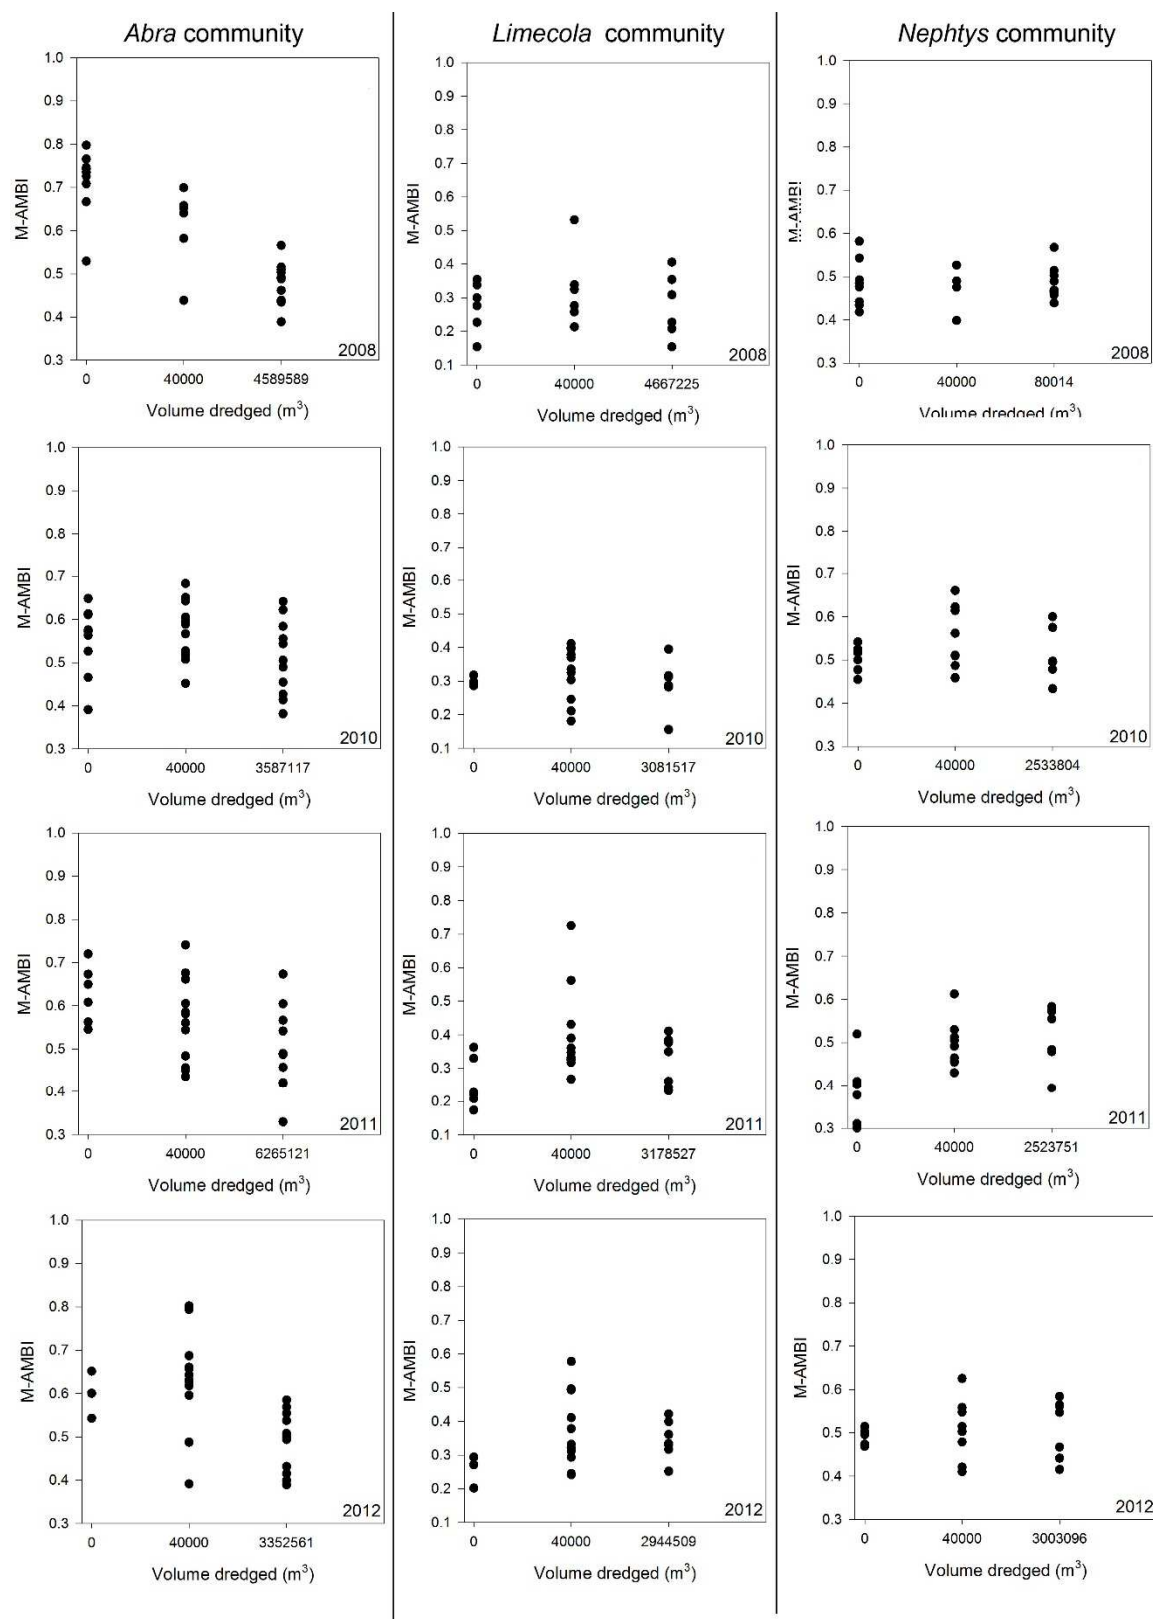

S6: Belgium stations submitted to dredge disposal. Relationship between the volumes dredged as intermediate and high versus TDI for the *Abra alba* community, the *Limecola bathica* community and the *Nephtys cirrosa* community in 2008, 2010, 2011 and 2012.

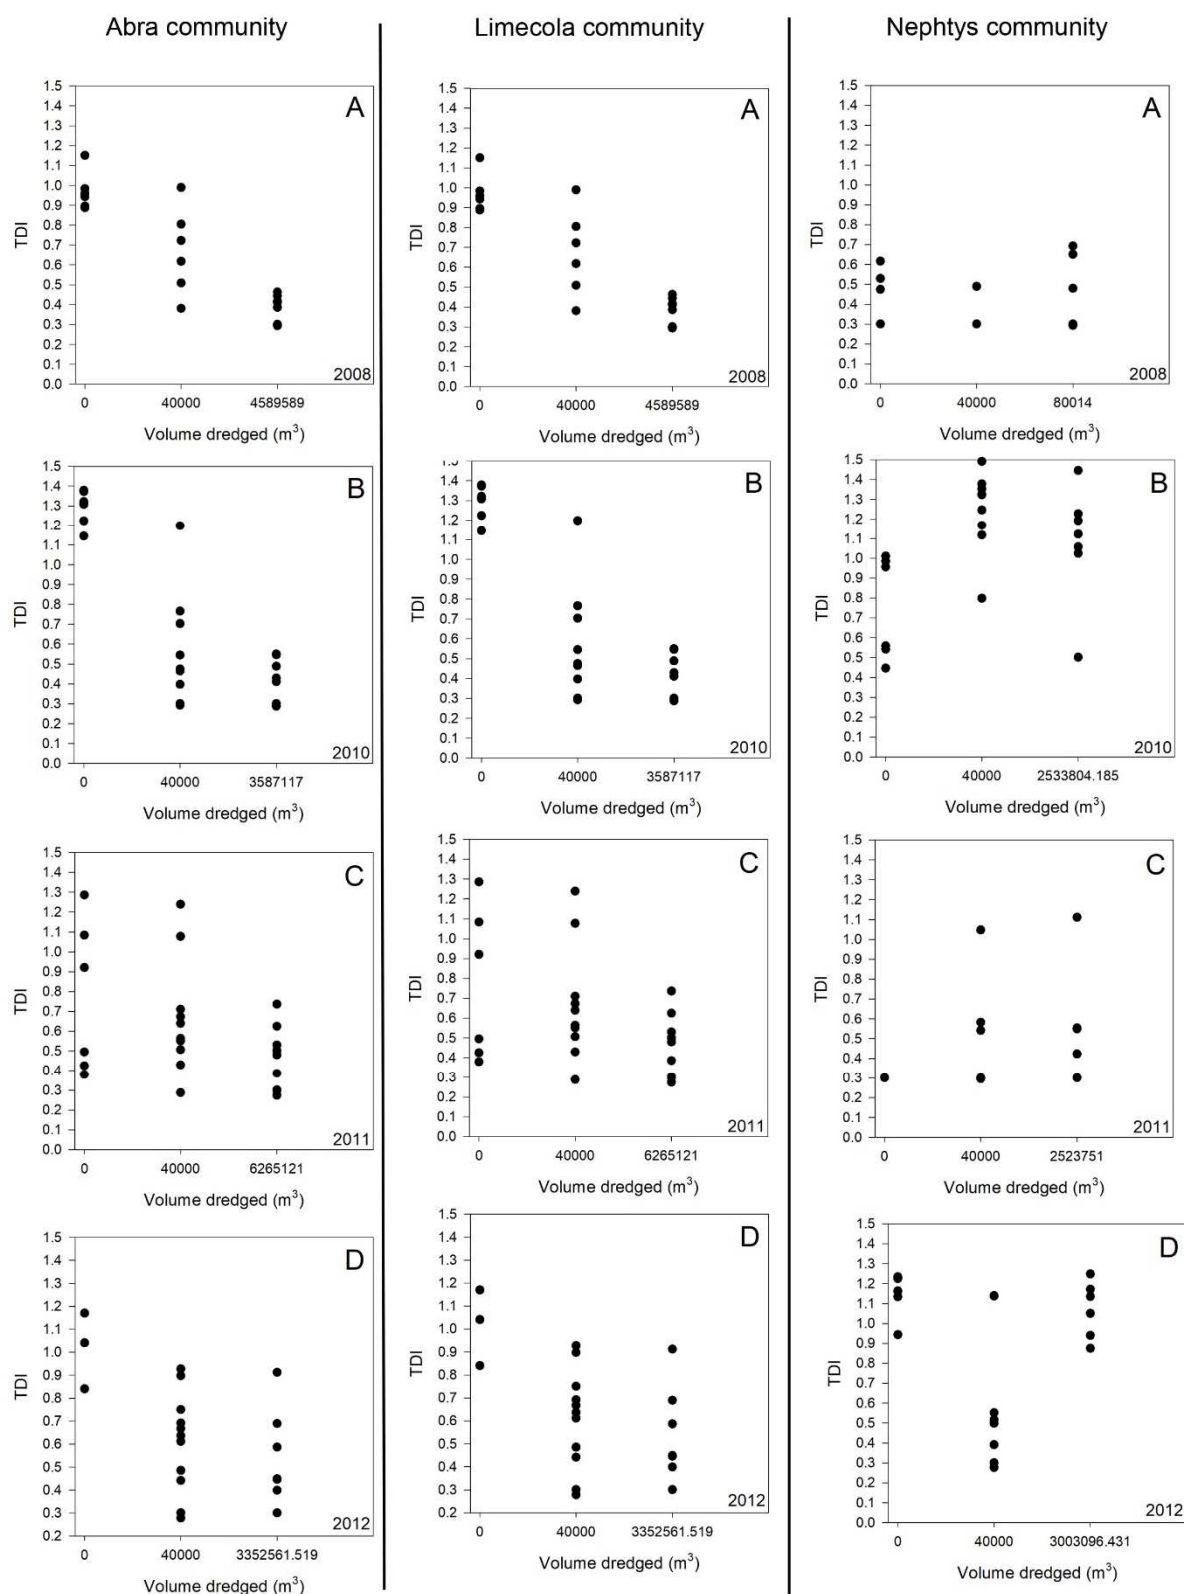

S7: Relationship between the fishing pressure (SAR, times trawled month<sup>-1</sup>) and the M-AMBI for the stations located in two fishing area and the unfished area in the German Bight (North Sea).

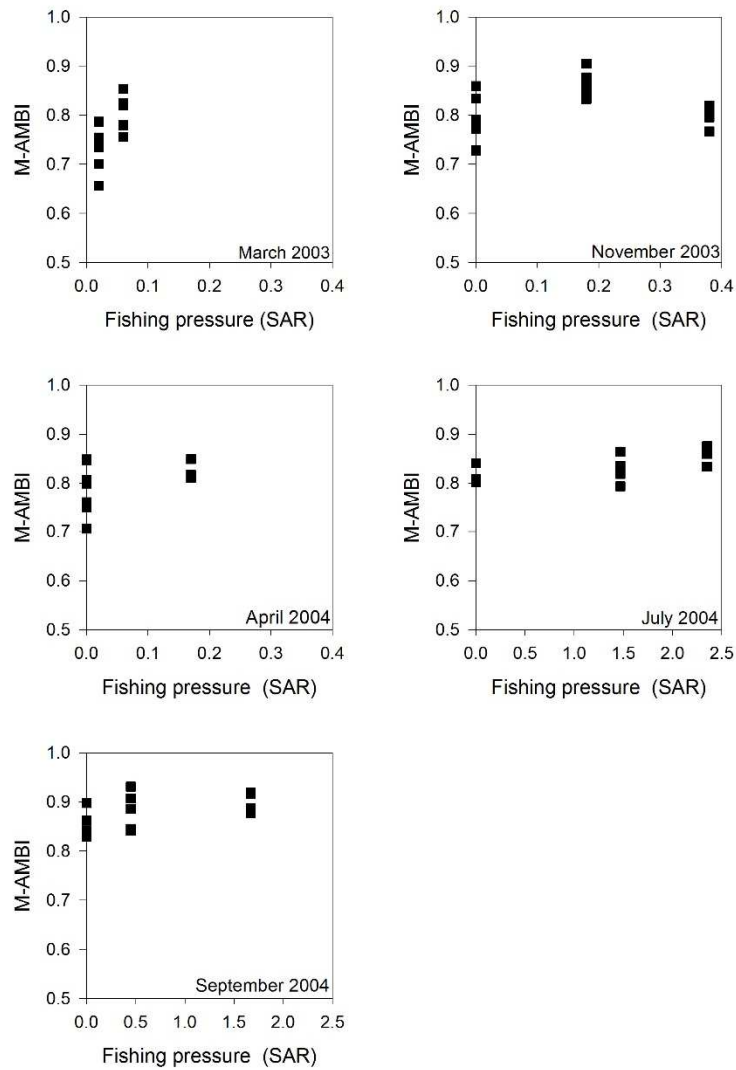

S8: Relationship between the fishing pressure (SAR, times trawled month<sup>-1</sup>) the TDI for the stations located in two fishing area and the unfished area in the German Bight (North Sea).

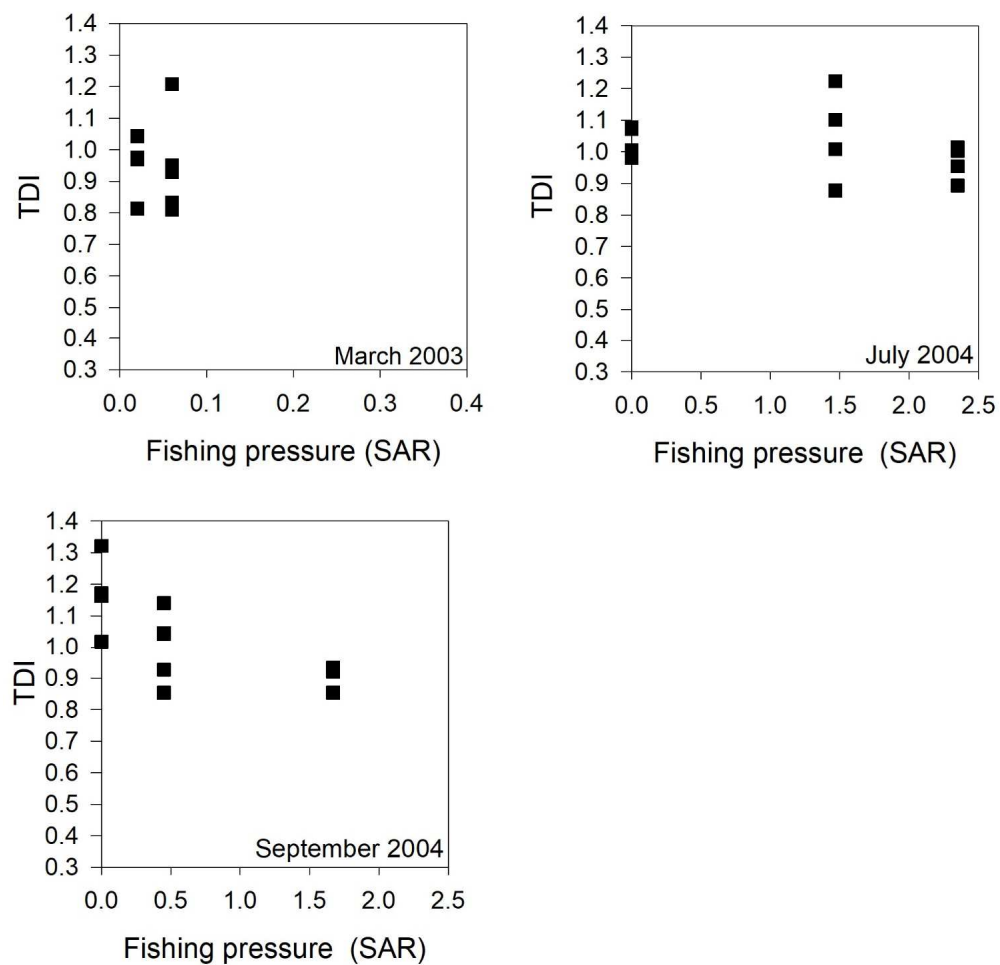

S9: Gullmarfjord. Temporal changes in  $B_{val}$ . The sampling dates used as references are indicated by a white square. Shaded areas are indicative of hypoxia events ( $[O_2] < 2 \text{ ml l}^{-1}$ ).

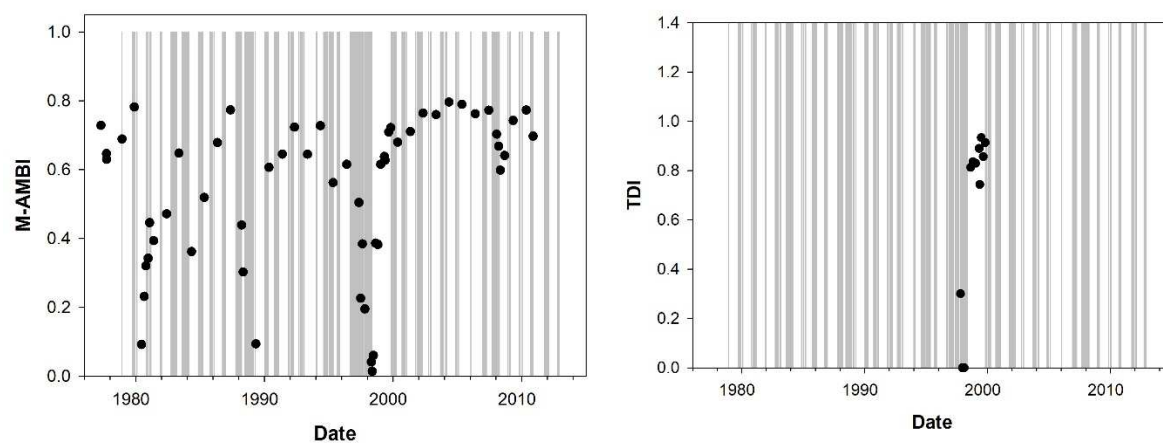

S10. nMDS based on square root transformed abundance data of the 3 communities of the Belgium stations submitted to dredge disposal.

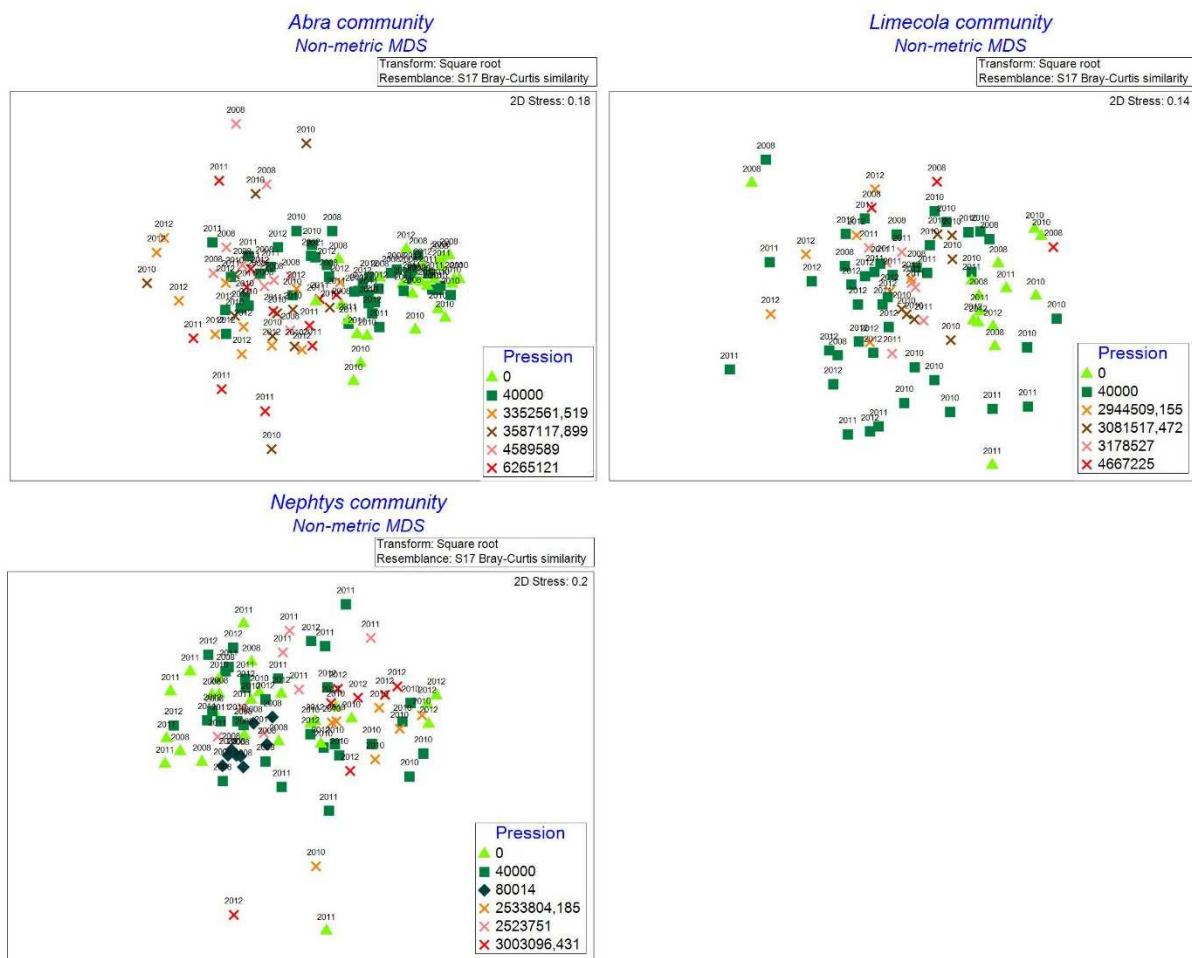

Supplement: s1 [file s1]
